# Supplementary material for: Differential binding of human and murine IgGs to catalytic and cell wall binding domains of Staphylococcus aureus peptidoglycan hydrolases
Source: Sci Rep. 2021 Jul 5;11:13865. doi: 10.1038/s41598-021-93359-6 (PMC8257689; doi:10.1038/s41598-021-93359-6)
Supplement: Supplementary file 1 — Supplementary Figures. [file 41598_2021_93359_MOESM1_ESM.pdf]

## Supplemental Figures

### Differential Binding of Human and Murine IgGs to Catalytic and Cell Wall

#### Binding Domains of *Staphylococcus aureus* Peptidoglycan Hydrolases

Min Wang<sup>1</sup>, Sanne van den Berg<sup>2</sup>, Yaremit Mora Hernández<sup>1</sup>, Aafke Hinke Visser<sup>1</sup>, Elias Vera Murguía<sup>1</sup>, Dennis G. A. M. Koedijk<sup>1</sup>, Channah Bellink<sup>1</sup>, Hilde Bruggen<sup>1</sup>, Irma A. J. M. Bakker-Woudenberg<sup>2</sup>, Jan Maarten van Dijl<sup>1\*</sup>, and Girbe Buist<sup>1</sup>

<sup>1</sup>Department of Medical Microbiology, University of Groningen, University Medical Center Groningen, Hanzeplein 1, P.O. box 30001, 9700 RB Groningen, the Netherlands

<sup>2</sup>Department of Medical Microbiology and Infectious Diseases, Erasmus University Medical Center, Rotterdam, The Netherlands.

\*To whom correspondence should be addressed: Department of Medical Microbiology, University of Groningen, University Medical Center Groningen, Hanzeplein 1, P.O. box 30001, HPC EB80, 9700 RB Groningen, the Netherlands, Tel. +31-50-3615187, Fax. +31-50-3619105, e-mail: j.m.van.dijl01@umcg.nl

## Supplemental Figure 1

**A**

|        |     |                                                              |     |
|--------|-----|--------------------------------------------------------------|-----|
| S-CHAP | 230 | YTWGQCTYHVFNRRAEIGKGISTYWWNANNWDNAAAADGYTIDNRPTVGSIAQTDVG--- | 286 |
|        |     | Y GQCT++V+NR + G IS +A+NW+N A Y + + P + + G                  |     |
| A-CHAP | 508 | YPHGQCTWYVYNRMKQFGTSISGDLGDAHNWNNRAQYRDYQVSHTPKRHAADVFEAGQFG | 567 |
| S-CHAP | 287 | ---YYGHVMFVERVNNDGSILVSEMNYSAAPGILTYRTVPAYQVNNYRYI           | 333 |
|        |     | +YGHV FVE+VN+DGSII++SE N GI+++RT+ A YI                       |     |
| A-CHAP | 568 | ADQHYGHVAFVEKVNDSGSIVISESNVKGL-GIISHRTINAAAAEELSYI           | 616 |

**B**

|      |     |                                                                |     |
|------|-----|----------------------------------------------------------------|-----|
| LytM | 184 | GHAKDASWLT SRKQLQPYGQYHGG--GAHYGVDYAMPENSPVYSLTDGTVVQAGWSNYG   | 240 |
|      |     | GH+K + + + +G+Y G HYG+D+A+P+ +P+ + T+G V + ++N                 |     |
| LytU | 47  | GHSKWEDFFRGSRTITETFGKYQHSPFDGKHYGIDFALPKGTPIKAPTNGKVTRI-FNNEL  | 105 |
| LytM | 241 | GGNQVTIKEANSNNYQWYMHNNRLTVSAGDKVKAGDQIAYSGSTGN-STAPHVHFQRMMSG  | 299 |
|      |     | GG + I E N +QWY+H ++ V GD+VKAGD IAYSG+TG +T H+HFQRM G          |     |
| LytU | 106 | GGKVLQIAEDNGEYHQWYHLHLDKYNVVKVGDVVKAGDIIAYSGNTGKQTTGAHLHFQRMKG | 165 |
| LytM | 300 | GIGNQYAVDPTSYLQ                                                | 314 |
|      |     | G+GN YA DP +++                                                 |     |
| LytU | 166 | GVGNAYAEDPKPFIE                                                | 180 |

### Supplemental Figure 1. Alignment of homologous domains of Sle1 and Aly.

(A) Alignment of the S-CHAP and A-CHAP domains of Sle1 and Aly, respectively. (B) Alignment of the C-terminal catalytic M23 domains of LytM and LytU. Identical residues are indicated between the aligned sequences and conservative replacements are indicated with +.

## Supplemental Figure 2

A

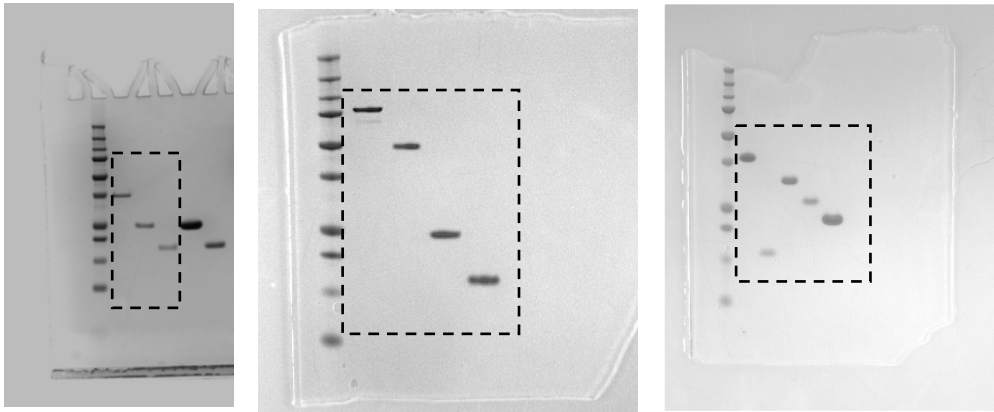

B

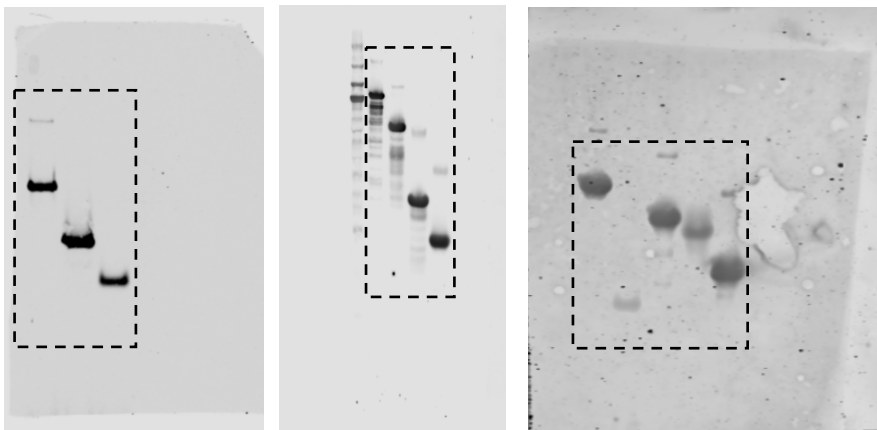

C

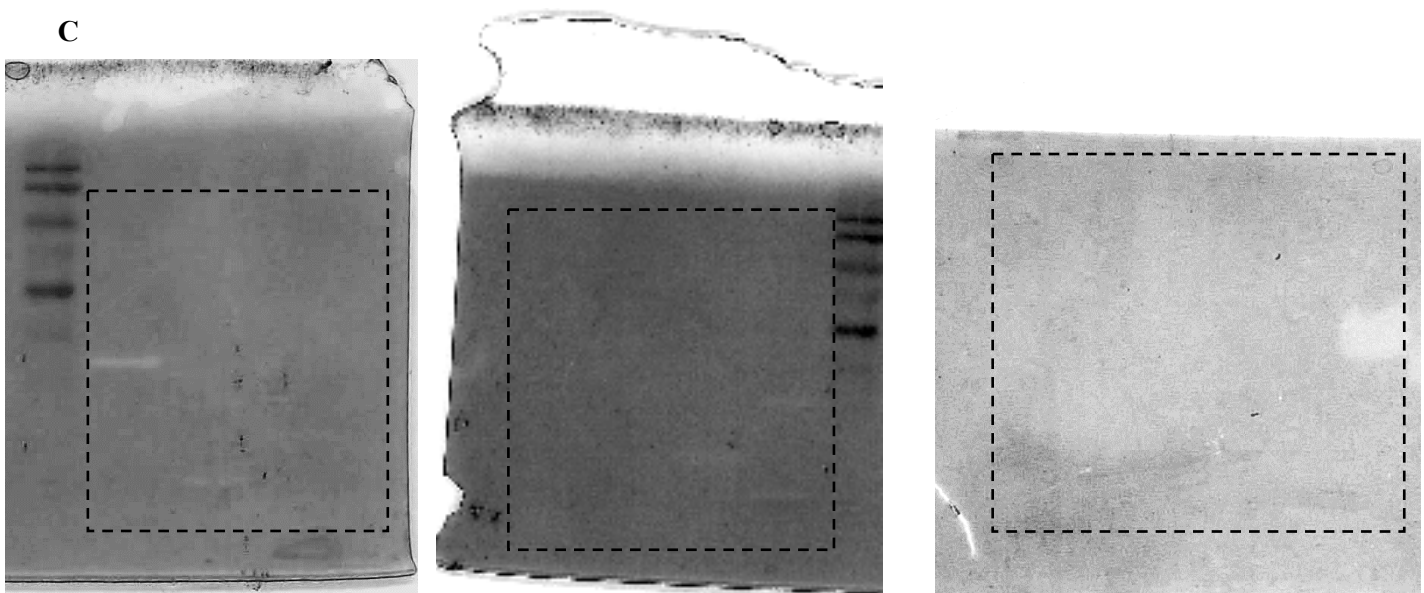

**D**

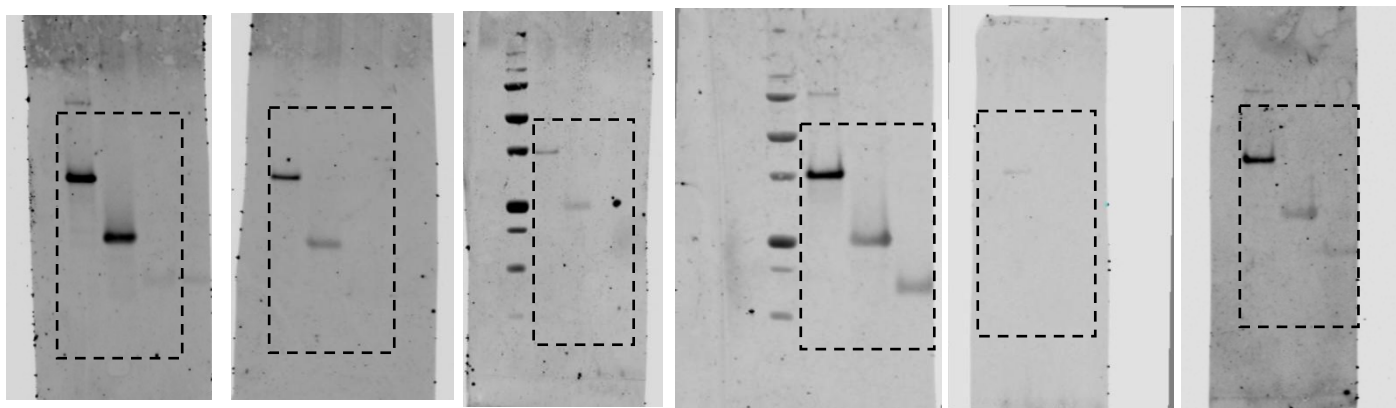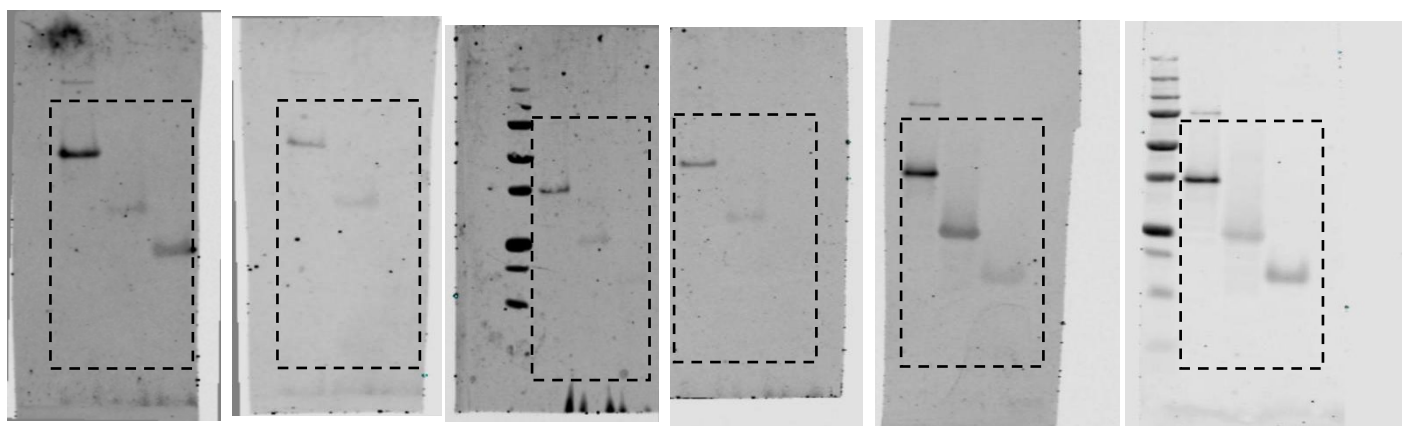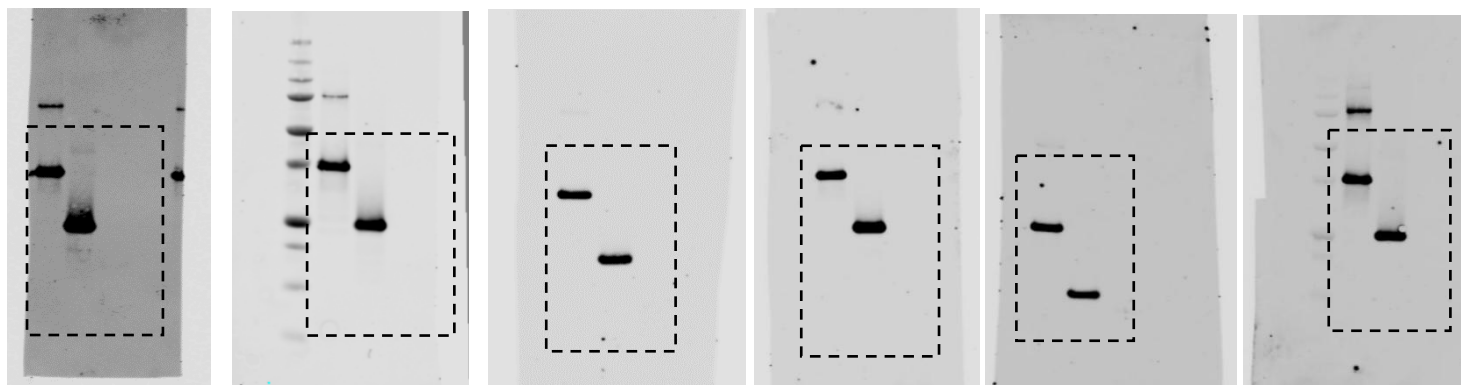

E

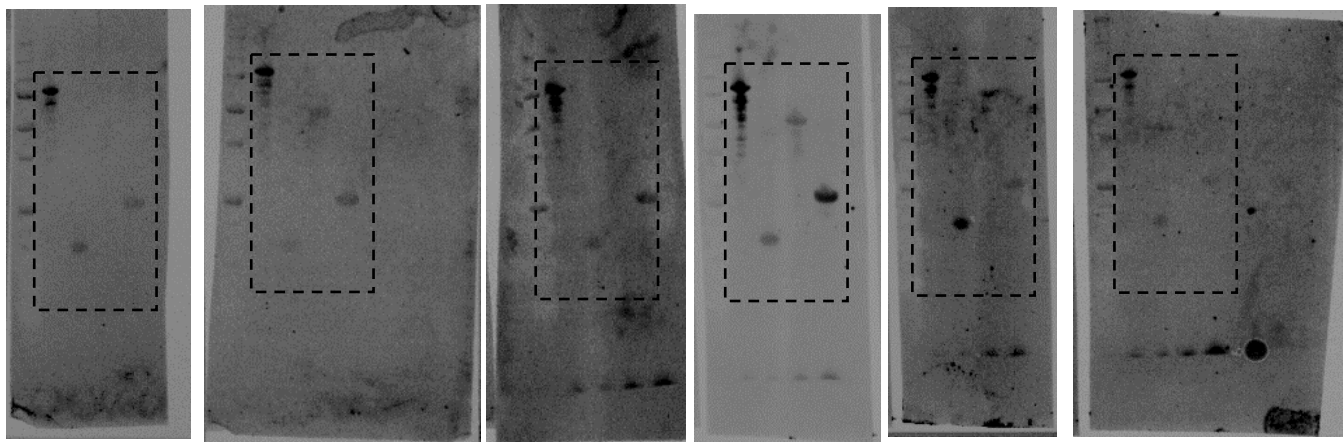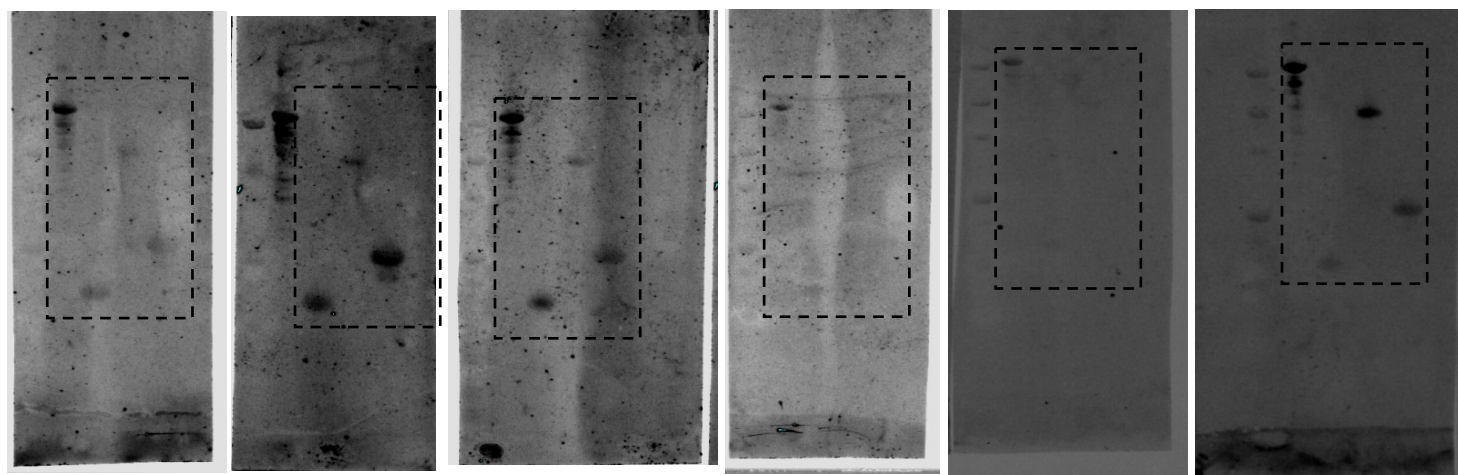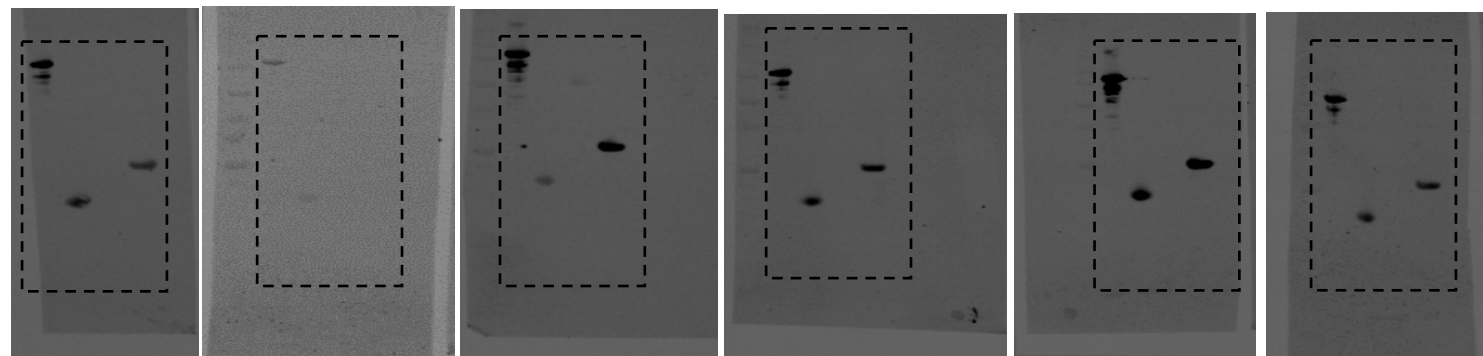

**F**

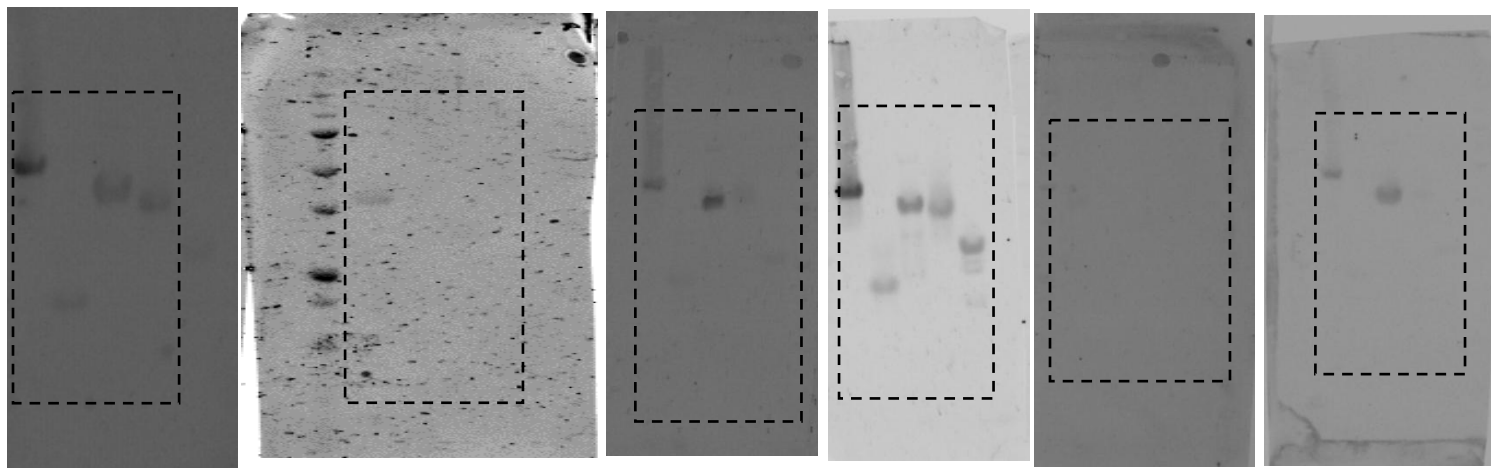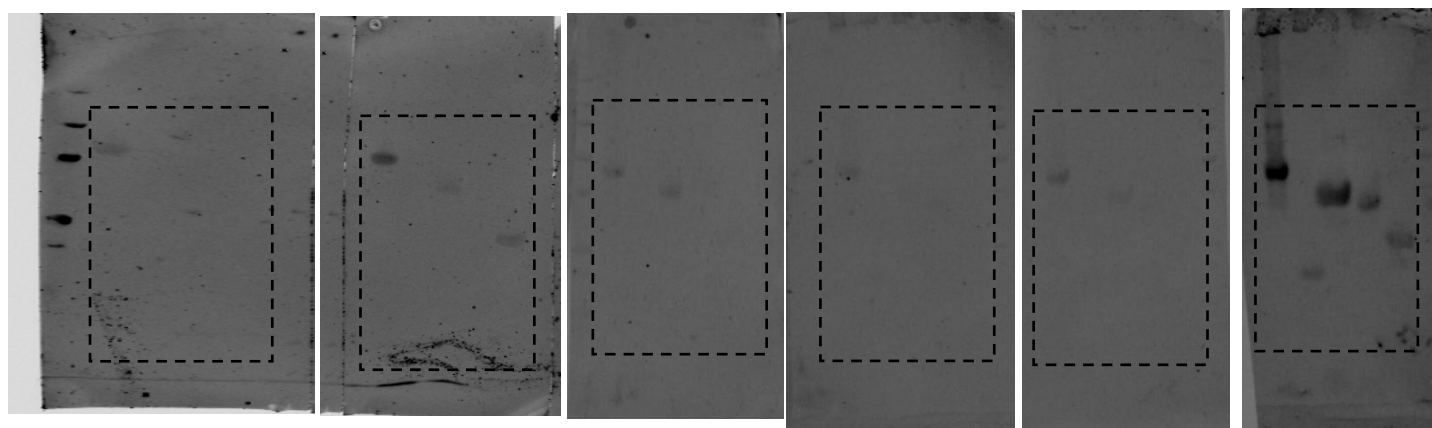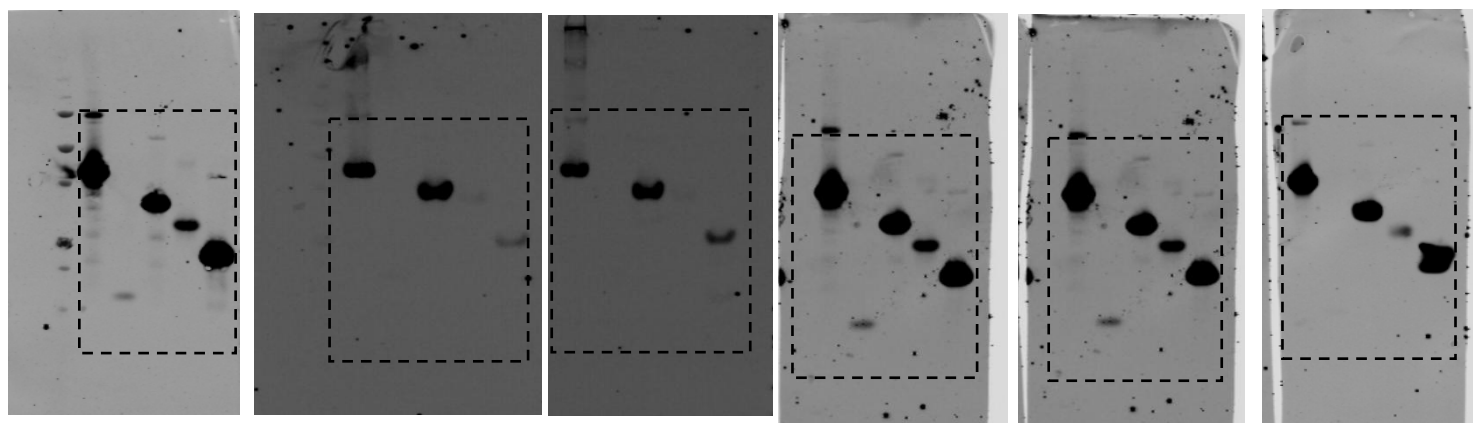

### **Supplemental Figure 2. Original gels and Western blots**

Panel A shows the full Simply Blue-stained gels of Figure 2 (left panels).

Panel B shows the full blots used to generate the Western blots presented in Figure 2 (right panels).

Panel C shows the zymograms used to generate Figure 3.

Panel D shows the full blots used to generate the Western blots presented in Figure 6.

Panel E shows the full blots used to generate the Western blots presented in Figure 7.

Panel F shows the full blots used to generate the Western blots presented in Figure 8.

All image sections presented in the respective Figures in the main manuscript have been marked with interrupted lines.
